# Supplementary material for: Reelin Is Required for Maintenance of Granule Cell Lamination in the Healthy and Epileptic Hippocampus
Source: PubMed Central journal article supplement (PMC8414139; doi:10.3389/fnmol.2021.730811), 2021-08-13
Supplement: Data_Sheet_1.pdf [file Data_Sheet_1.pdf]

*Supplementary Material*

Supplementary Figures

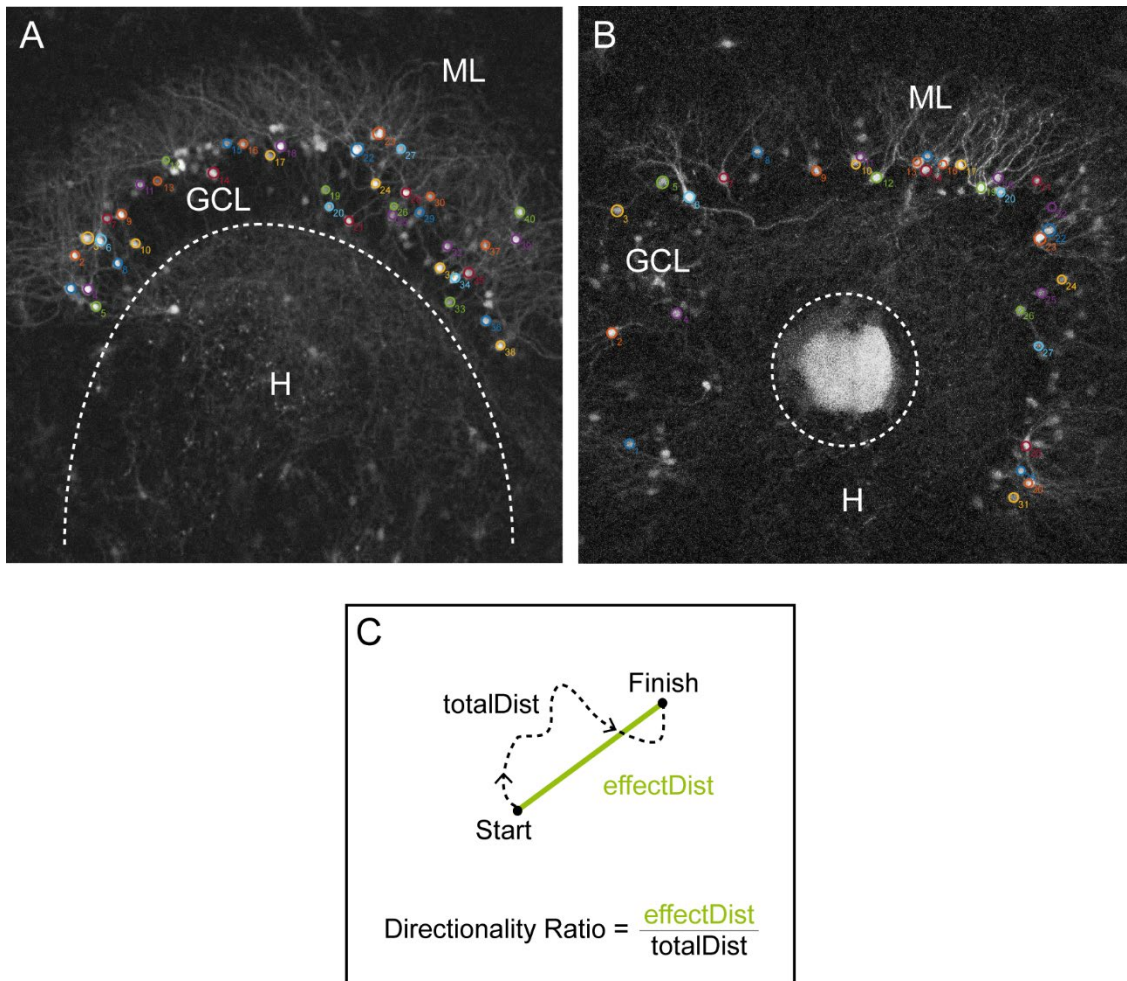

**Supplementary Figure 1. Automatic evaluation of the migration behavior of individual GCs analyzed with a custom Matlab® script.**

Cell bodies of the eGFP-positive GCs are automatically detected, and neurons are numbered (circles in different colors). The hilar-GCL (A) or microspheres (B) border (white dotted line, respectively) is marked by hand using an input tool implemented in the script. (C) Definition of the total distance (totalDist), the effective distance (effectDist) and the directionality ratio (modified from Gorelik and Gautreau, 2014). GCL, granule cell layer; H, hilus; ML, molecular layer.

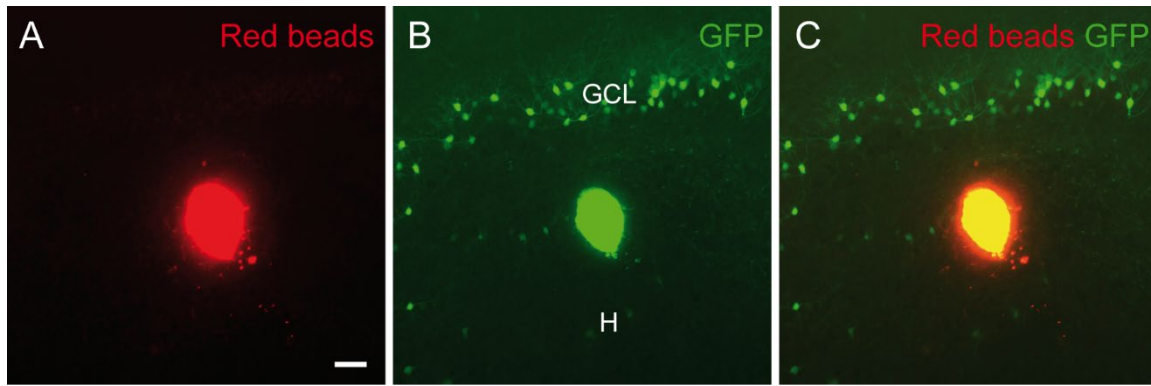

**Supplementary Figure 2. Red fluorescence beads are visible in the red and green channels.**

Photomicrograph of the red fluorescent beads placed into the hilus (A). Thy1-eGFP-labeled GCs and the fluorescent beads are in green (B). Note the colocalization in yellow (C), showing that the microspheres can be visualized in both channels. GCL, granule cell layer; H, hilus. Scale bar: 50  $\mu$ m.
